# Supplementary material for: Pharmacological interventions in hypoactive delirium: mapping the evidence through a scoping review
Source: Research Square preprint supplement (doi:10.21203/rs.3.rs-8585940/v1), 2026-01-16
Supplement: Supplementary file 1 [file 5196bcb0aec4c63006d1cc40.docx]

**Identification of studies via databases and registers**

Records removed before screening:

Duplicate records removed

(n = 55)

Records identified from:

Databases (n = 334)

**Identification**

Records excluded

(n = 201)

Records screened

(n = 279)

Reports not retrieved

(n = 9)

Reports sought for retrieval

(n = 78)

**Screening**

Reports excluded:

Did not evaluate hypoactive delirium (n = 36)

Did not report the outcome of interest (n = 8)

Published before 2015 (n = 5)

Wrong publication type (n = 7)

Wrong study population (n = 2)

Foreign language (n = 1)

Reports assessed for eligibility

(n = 69)

Studies included in review

(n = 10)

**Included**
